# Supplementary material for: A red-shifted photochromic sulfonylurea for the remote control of pancreatic beta cell function
Source: Royal Society of Chemistry journal article supplement (doi:10.1039/c5cc01224d), 2015-01-01
Supplement: c5cc01224d1.pdf [file c5cc01224d1.pdf]

## **A red-shifted photochromic sulfonyleurea for the remote control of pancreatic beta cell function**

J. Broichhagen,<sup>a</sup> J. A. Frank,<sup>a</sup> N. R. Johnston,<sup>b</sup> R. K. Mitchell,<sup>b</sup> K. Šmid,<sup>a</sup> P. Marchetti,<sup>c</sup> M. Bugliani,<sup>c</sup>  
G. A. Rutter,<sup>b</sup> D. Trauner,<sup>\*a</sup> and D. J. Hodson<sup>\*b</sup>

<sup>a</sup> Department of Chemistry and Center for Integrated Protein Science, LMU Munich, Munich, Germany. E-mail: dirk.trauner@lmu.de

<sup>b</sup> Section of Cell Biology and Functional Genomics, Department of Medicine, Imperial College London, London W12 0NN, UK. E-mail: d.hodson@imperial.ac.uk

<sup>c</sup> Department of Clinical and Experimental Medicine, Islet Cell Laboratory, University of Pisa, Pisa, Italy.

## EXPERIMENTAL PROCEDURES

### Chemistry

Solvents for chromatography and reactions were purchased in HPLC grade or distilled over an appropriate drying reagent prior to use. If necessary, solvents were degassed either by freeze-pump-thaw or by bubbling N<sub>2</sub> through the vigorously stirred solution for several min. Unless otherwise stated, all other reagents were used without further purification from commercial sources.

Flash column chromatography was carried out on silica gel 60 (0.040–0.063 mm) purchased from Merck. Reactions and chromatography fractions were monitored by thin layer chromatography (TLC) on Merck silica gel 60 F254 glass plates. The spots were visualized under UV light at  $\lambda = 254$  nm.

NMR spectra were recorded in deuterated solvents on a BRUKER Avance III HD 400 (equipped with a CryoProbe™) instrument and calibrated to residual solvent peaks (<sup>1</sup>H/<sup>13</sup>C in ppm): DMSO-d<sub>6</sub> (2.50/39.52). Multiplicities are abbreviated as follows: s = singlet, d = doublet, t = triplet, q = quartet, p = pentet, br = broad, m = multiplet. Spectra are reported based on appearance, not on theoretical multiplicities derived from structural information.

Low- and high-resolution electrospray (ESI) mass spectra were obtained on a Varian MAT 711 MS instrument operating in either positive or negative ionization modes.

UV/Vis spectra and time-resolved light-dependent **JB558** activity were recorded on a Varian Cary 50 Bio UV-Visible Spectrophotometer using Helma SUPRASIL precision cuvettes (10 mm light path) equipped with an UHP-LED-520 (Prizmatic) connected to an AC/DC switching adapter (Mean Well Enterprises).

LC-MS was performed on an Agilent 1260 Infinity HPLC System, MS-Agilent 1100 Series, Type: 1946D, Model: SL, equipped with a Agilent Zorbax Eclipse Plus C18 (100 x 4.6 mm, particle size 3.5 micron) RP column with a constant flow-rate of 2 mL/min.

Melting points were measured on the apparatus BÜCHI Melting Point B-540 from *BÜCHI Labortechnik AG* or on an EZ-Melt apparatus from *Stanford Research Systems* and are uncorrected.

Infrared spectra (IR) were recorded on a PERKIN ELMER Spectrum BX-59343 instrument as neat materials. For detection a SMITHS DETECTION DuraSam-plIR II Diamond ATR sensor was used. The measured wave numbers are reported in cm<sup>-1</sup>.

### Whole-cell electrophysiology in HEK293T cells

HEK293T cells were incubated at 37 °C (10% CO<sub>2</sub>) in Dulbecco's Modified Eagle Medium (DMEM) + 10% FBS and were split at 80-90% confluency. Detached cells were diluted in growth medium and plated on acid-etched coverslips coated with poly-*L*-lysine in a 24 well plate. 50,000 cells were added to each well in 500  $\mu$ L standard growth medium along with the DNA (per coverslip: 250 ng Kir6.2, 350 ng SUR1, 50 ng YFP) and JetPRIME transfection reagents according to the manufacturer's instructions (per coverslip: 50  $\mu$ L JetPRIME buffer, 0.5  $\mu$ L JetPRIME transfection reagent). The transfection medium was exchanged for normal growth media 4 hr after transfection and electrophysiological experiments were carried out 20-40 hr later. Whole cell patch clamp experiments were performed using a standard electrophysiology setup equipped with a HEKA Patch Clamp EPC10 USB amplifier and PatchMaster software (HEKA Elektronik). Micropipettes were generated from "Science Products GB200-F-8P with filament" pipettes using a Narishige PC-10 vertical puller. The patch pipette resistance varied between 3-9 M $\Omega$ . The bath solution contained in mM: 3 KCl, 118 NaCl, 25 NaHCO<sub>3</sub>, 2 CaCl<sub>2</sub>, 1 MgCl<sub>2</sub>, 10 HEPES (NaOH to pH 7.4). The pipette solution contained in mM: 90 K-gluconate, 10 NaCl, 10 KCl, 1 MgCl<sub>2</sub>, 10 EGTA, 60 HEPES (KOH to pH 7.3). Compounds were applied by direct pipette of 1  $\mu$ L DMSO stock (43.4 mM or 4.34 mM) directly into the recording bath. Voltage clamp measurements were carried out at room temperature with a holding

potential of  $-60$  mV. Compound switching was evaluated at  $\lambda = 520$  nm using a UH-LED-520 light source and fibre optic placed  $\sim 1$ cm from the sample.

### **Isolation of rodent islets**

C57BL6 mice were maintained in a specific pathogen-free facility under a 12 h light–dark cycle with ad libitum access to water and food. Euthanasia was carried out using a designated schedule-1 method and collagenase solution (1 mg/mL) injected into the bile duct to inflate the pancreas, before isolation of islets using Histopaque gradient separation. Islets were cultured overnight in solution containing Roswell Park Memorial Institute (RPMI) medium supplemented with 10% foetal calf serum and 100 U/mL penicillin & streptomycin 100  $\mu$ g/mL. All procedures were regulated by the Home Office according to the Animals (Scientific Procedures) Act 1986 of the United Kingdom (PPL 70/7349).

### **Isolation of human islets**

Islets were isolated with necessary local and national ethical permissions, including consent from the next of kin, and cultured as above except for further supplementation with 0.25 mg/mL fungizone. All studies involving human tissue were approved by the National Research Ethics Committee London (Fulham), REC #07/H0711/114.

### **Calcium and Epac2 imaging**

Islets were loaded with Fluo2-AM (10  $\mu$ M) for 45 min before performing functional multicellular  $\text{Ca}^{2+}$  imaging (fMCI), as previously described.<sup>1,2</sup> Briefly, pulsed  $\lambda = 491$  nm light was delivered using a solid state laser (Cobalt) coupled to a Nipkow spinning disk head (Yokogawa CSU-10) and a Zeiss Axiovert M200 equipped with a 10x/0.3 NA objective (EC Plan-Neofluar, Zeiss). Emitted signals were captured from  $\lambda = 500$ -550 nm using a Hamamatsu ImageEM 9100-13 EM-CCD camera. Illumination to induce photoswitching was performed using a  $\lambda = 561 \pm 5$  laser coupled to the microscope with a multimodal fibre optic. Likewise, Epac2 imaging was performed as described,<sup>2,3</sup> using HEK293T cells transiently transfected with full length Epac2-camps (a kind gift from Prof. Jin Zhang, Johns Hopkins University),<sup>4</sup> and emission filters centred on Cerulean ( $\lambda = 470$  nm) and Venus ( $\lambda = 530$  nm) ( $\lambda$  excitation = 440 nm). FRET was calculated as the ratio of Cerulean:Venus fluorescence and signals normalized using  $R/R_{\min}$ , where  $R_{\min}$  is the minimum ratio. Finally, Fura-2 (10  $\mu$ M)-loaded islets were imaged using a monochromator set to alternately excite at 340 nm and 380 nm, with detection at  $\lambda = 500$ -550 nm using an Andor Zyla 5.5 sCMOS.  $\text{Ca}^{2+}$  signals were presented as F340/F380, where F340 and F380 represent fluorescence intensity at 340 nm and 380 nm, respectively. In all cases, HEPES-bicarbonate buffer was used, containing in mM: 120 NaCl, 4.8 KCl, 24  $\text{NaHCO}_3$ , 0.5  $\text{Na}_2\text{HPO}_4$ , 5 HEPES, 2.5  $\text{CaCl}_2$ , 1.2  $\text{MgCl}_2$  and 5 D-glucose. Drugs were applied via the perfusion system, as for electrophysiological recordings.

### **Cytotoxicity assays**

DMSO- or **JB558**-treated islets were incubated with 3  $\mu$ M of calcein-AM (live) and 2.5  $\mu$ M of propidium iodide (dead), and absorbance/emission detected at  $\lambda = 491/525$  nm (calcein) and  $\lambda = 561/620$  nm (propidium iodide). The area of dead:live cells was calculated as a unitary ratio.

### **Insulin secretion assays**

Batches of six islets were incubated for 1 hr in 0.5 mL of Krebs-HEPES-bicarbonate solution containing in mM: 130 NaCl, 3.6 KCl, 1.5  $\text{CaCl}_2$ , 0.5  $\text{MgSO}_4$ , 0.5  $\text{NaH}_2\text{PO}_4$ , 2  $\text{NaHCO}_3$ , 10 HEPES, 5 D-glucose and 0.1% (wt/vol) bovine serum albumin, pH 7.4. Treatments were applied as indicated and  $\lambda = 560$  nm delivered as pulses using a BMG Fluostar Optima platereader. Insulin concentrations in the supernatant were measured using a proprietary Cisbio HTRF assay according to the manufacturer's instructions.

### **[3H]-Glibenclamide radioassay**

HEK293T cells expressing SUR1 were washed twice in assaying buffer, before incubation for 50 min with [3H]-glibenclamide and a concentration series of either glimepiride or **JB558**. Incubation was terminated by rapid filtration through Whatman GF/C filters subsequent to washing. Radioactivity was counted 6 hr after cell and filter lysis in 200 mL Rotiszint EcoPlus using a scintillation counter.

### **AzoReductase assays**

AzoReductase (EC 1.7.1.6) catalyses the reductive cleavage of an azobenzene diazene bond into the corresponding anilines.<sup>5</sup> *Escherichia coli* (BL21 DE3) cells served as a model system as they are known to carry azoreductase (Supplementary Fig. 5).<sup>6</sup>

*Escherichia coli* (BL21 DE3) cells were transformed with pcDNA3.1 (Amp resistance) and grown in LB media with ampicillin to an  $OD_{600} = 1.0$ . Methyl red (MR) or **JB558** was added from a 50 mM stock solution in DMSO to a final concentration of 50  $\mu$ M with or without bacteria. DMSO alone served as control. Solutions were inoculated at 37 °C and 180 rpm and aliquots (100  $\mu$ L) were taken every 3 min and transferred into Eppendorf tubes. Eppendorf tubes were centrifuged for 1 min (4 °C and 12,000 rpm) and then stored immediately on ice for the duration of the experiment. The supernatant of each Eppendorf tube was transferred into a well of a 96-well plate and absorbance was measured at the respective wavelength with a plate reader. After 27 min, MR was not detectable anymore, assuming azoreductase performed complete diazene cleavage.

### **Statistics**

Multifactorial comparisons were made using one-way ANOVA followed by Bonferonni's post-hoc test. Dose-response curves were fitted using a sigmoid equation (SD attributable to the unexplained variance = 52 cpm). All analyses were conducted using Graphpad Prism (Graphpad Software) and results deemed significant at  $P < 0.05$ .

## SYNTHESIS

### 5-Amino-1,3,4-thiadiazole-2-sulfonamide (2)

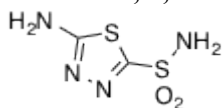

*N*-(5-Sulfamoyl-1,3,4-thiadiazol-2-yl)acetamide (acetazolamide) (3.00 g, 13.5 mmol, 1.0 eq.) was dissolved in 3 M HCl (23.4 mL) and refluxed at 110 °C for 3 h. The mixture was neutralized with 4 M NaOH (17.6 mL) and extracted with EtOAc (3 x 200 mL). The combined organic layers were washed with brine (1 x 200 mL) and concentrated *in vacuo*. 2.18 g (12.1 mmol) of the desired product were obtained in 90% yield as a white fluffy powder.

<sup>1</sup>H NMR (400 MHz, DMSO-*d*<sub>6</sub>): δ [ppm] = 8.08 (br s, 2H), 7.90 (s, 2H).

<sup>13</sup>C NMR (101 MHz, DMSO-*d*<sub>6</sub>): δ [ppm] = 171.7, 157.9.

HRMS (ESI): calc. for C<sub>2</sub>H<sub>5</sub>N<sub>4</sub>O<sub>2</sub>S<sub>2</sub><sup>+</sup> [M+H]<sup>+</sup>: 180.9848, found: 180.9849.

R<sub>t</sub> (LCMS; MeCN/H<sub>2</sub>O/formic acid = 10/90/0.1 → 90/10/0.1 over 7 min) = 0.780 min.

UV/Vis (LCMS): λ<sub>max</sub> = 278 nm.

IR (ATR): wave number/cm<sup>-1</sup> = 3396, 3310, 3169, 1684, 1600, 1563, 1492, 1443, 1346, 1176, 1138, 1080, 974, 917 801.

m.p. = 202 °C

### (*E*)-5-((4-(Diethylamino)phenyl)diazenyl)-1,3,4-thiadiazole-2-sulfonamide (3)

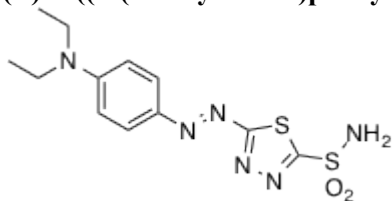

**2** (800 mg, 4.44 mmol, 1.0 eq.) was dissolved in H<sub>2</sub>O (32.0 mL) and cHCl (8.00 mL) at 0 °C. A 1.2 M aqueous solution of sodium nitrite (738 mg, 10.7 mmol, 8.91 mL, 2.4 eq.) was added dropwise and the resulting reaction mixture was stirred for 10 min at 0 °C. The prepared yellow solution was added dropwise over 30 min to a solution of *N,N*-diethylaniline (748 μL, 4.88 mmol, 1.1 eq.) in MeOH/1 M NaOAc (40.0 mL/10.0 mL) at 0 °C and stirred for 15 min at 0 °C. The reaction was allowed to warm to r.t. and stirred overnight. The reaction mixture was then acidified with 1 M HCl and extracted with EtOAc (3 x 250 mL), washed with brine (1 x 250 mL) and the crude product was filtered through a pore III frit with EtOAc containing a plug of silica (50 mL). 908 mg (2.67 mmol) of **3** were obtained in 60% yield as a deep purple solid.

<sup>1</sup>H NMR (400 MHz, DMSO-*d*<sub>6</sub>): δ [ppm] = 8.47 (br s, 2H), 7.86 (d, *J* = 9.2 Hz, 2H), 6.96 (d, *J* = 9.2, 2H), 3.59 (q, *J* = 6.8 Hz, 4H), 1.20 (t, *J* = 7.2 Hz, 6H).

<sup>13</sup>C NMR (101 MHz, DMSO-*d*<sub>6</sub>): δ [ppm] = 183.3, 167.3, 153.8, 142.0, 112.6, 79.2, 44.9, 12.6.

HRMS (ESI): calc. for C<sub>12</sub>H<sub>17</sub>N<sub>6</sub>O<sub>2</sub>S<sub>2</sub><sup>+</sup> [M+H]<sup>+</sup>: 341.0849, found: 341.0846.

UV/Vis (LCMS): λ<sub>max</sub> = 540 nm.

R<sub>t</sub> (LCMS; MeCN/H<sub>2</sub>O/formic acid = 10/90/0.1 → 90/10/0.1 over 7 min) = 3.845 min.

IR (ATR): wave number/cm<sup>-1</sup> = 3303, 3060, 1713, 1602, 1543, 1416, 1357, 1298, 1267, 1215, 1174, 1142, 1068, 909, 829, 788.

m.p. = >275 °C

**(E)-N-(Cyclohexylcarbamoyl)-5-((4-(diethylamino)phenyl)-diazenyl)-1,3,4-thiadiazole-2-sulfonamide (JB558)**

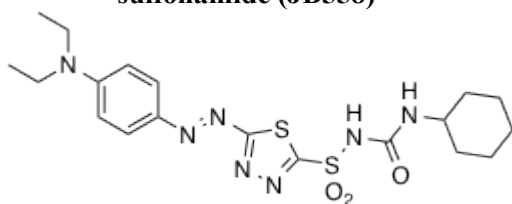

**3** (5.1 mg, 15.0  $\mu\text{mol}$ , 1.0 eq.) was dissolved in dry MeCN (4.0 mL) under a  $\text{N}_2$ -atmosphere.  $\text{NEt}_3$  (2.08  $\mu\text{L}$ , 15.0  $\mu\text{mol}$ , 1.0 eq.) and cyclohexyl isocyanate (48.0  $\mu\text{L}$ , 376  $\mu\text{mol}$ , 25.0 eq.) were added and the mixture was refluxed for 4 h at 90  $^\circ\text{C}$ . The solution was concentrated to 1 mL, filtered through a PTFE filter (CHROMAFIL® Xtra PTFE 0.45) and subjected to RP-HPLC (MeCN/ $\text{H}_2\text{O}$ /formic acid = 5/95/0.1  $\rightarrow$  80/20/0.1 over 40 min). 2.6 mg (5.6  $\mu\text{mol}$ ) of the desired product was obtained in 37% yield.

**$^1\text{H NMR}$**  (400 MHz,  $\text{DMSO-d}_6$ ):  $\delta$  [ppm] = 7.86 (d,  $J$  = 9.2 Hz, 2H), 6.97 (d,  $J$  = 9.6 Hz, 2H), 6.68 (m, 1H), 3.60 (q,  $J$  = 7.2 Hz, 4H), 3.54–3.47 (m, 1H), 1.75–1.60 (m, 4H), 1.55–1.45 (m, 2H), 1.25–1.14 (m, 10H).

**$^{13}\text{C NMR}$**  (101 MHz,  $\text{DMSO-d}_6$ ):  $\delta$  [ppm] = 184.2, 164.4 (formic acid), 163.1, 158.2, 154.0, 150.6, 142.1, 112.8, 48.6, 45.0, 32.2, 24.3, 12.6.

**HRMS** (ESI): calc. for  $\text{C}_{19}\text{H}_{28}\text{N}_7\text{O}_3\text{S}_2^+$  [ $\text{M}+\text{H}$ ] $^+$ : 466.1690, found: 466.1690.

**UV/Vis** (LCMS):  $\lambda_{\text{max}}$  = 545 nm.

**$R_t$**  (LCMS; MeCN/ $\text{H}_2\text{O}$ /formic acid = 10/90/0.1  $\rightarrow$  90/10/0.1 over 7 min) = 4.691 min.

**IR** (ATR): wave number/ $\text{cm}^{-1}$  = 2933, 1682, 1603, 1530, 1450, 1323, 1305, 1265, 1208, 1139, 1072, 1009, 907, 826, 788, 696, 655.

**m.p.** = 171  $^\circ\text{C}$

Extinction coefficient JB558 (Ringer solution):  $\epsilon_{530\text{ nm}} = 114,000\text{ mol}^{-1}\text{ cm}^{-1}$ .

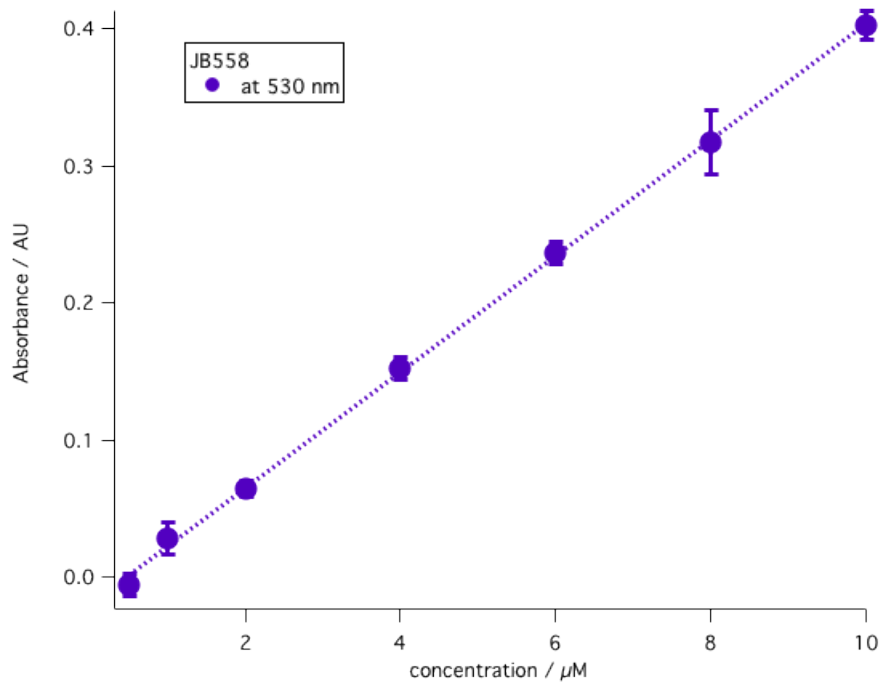

$pK_a$  JB558 (aqueous buffer/DMSO = 4/1) =  $2.36 \pm 0.05$ ; measured according to Martinez *et al.*<sup>7</sup>

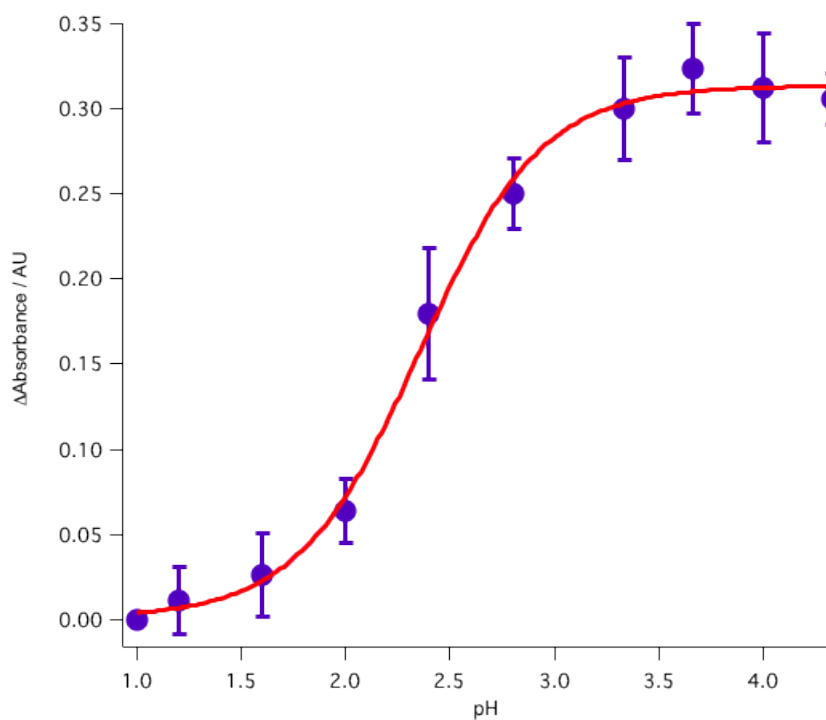

## LIQUID CHROMATOGRAPHY TRACES

Note that the reference is set to  $\lambda_{\text{ref}} = 500$  nm, resulting in negative absorption peaks in the chromatogram for red-shifted compounds **3** and **JB558**.

### 5-Amino-1, 3, 4-thiadiazole-2-sulfonamide (**2**)

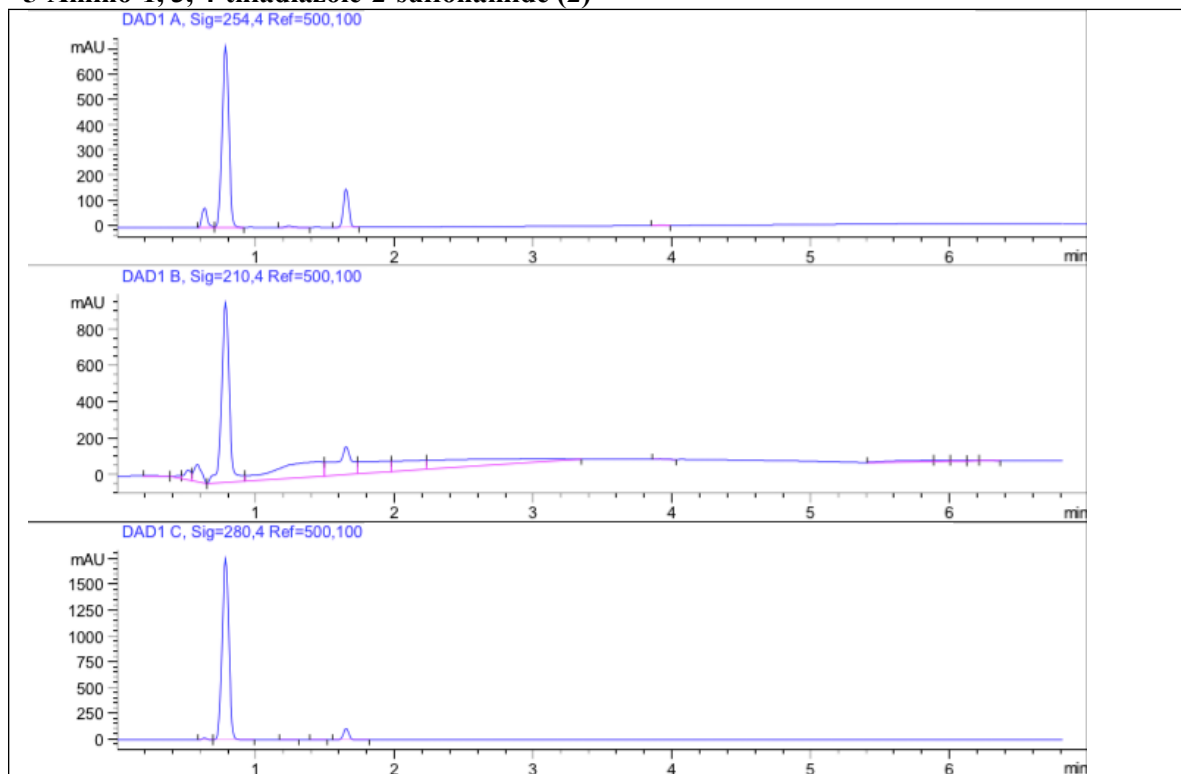

### (*E*)-5-((4-(Diethylamino)phenyl)diazenyl)-1, 3, 4-thiadiazole-2-sulfonamide (**3**)

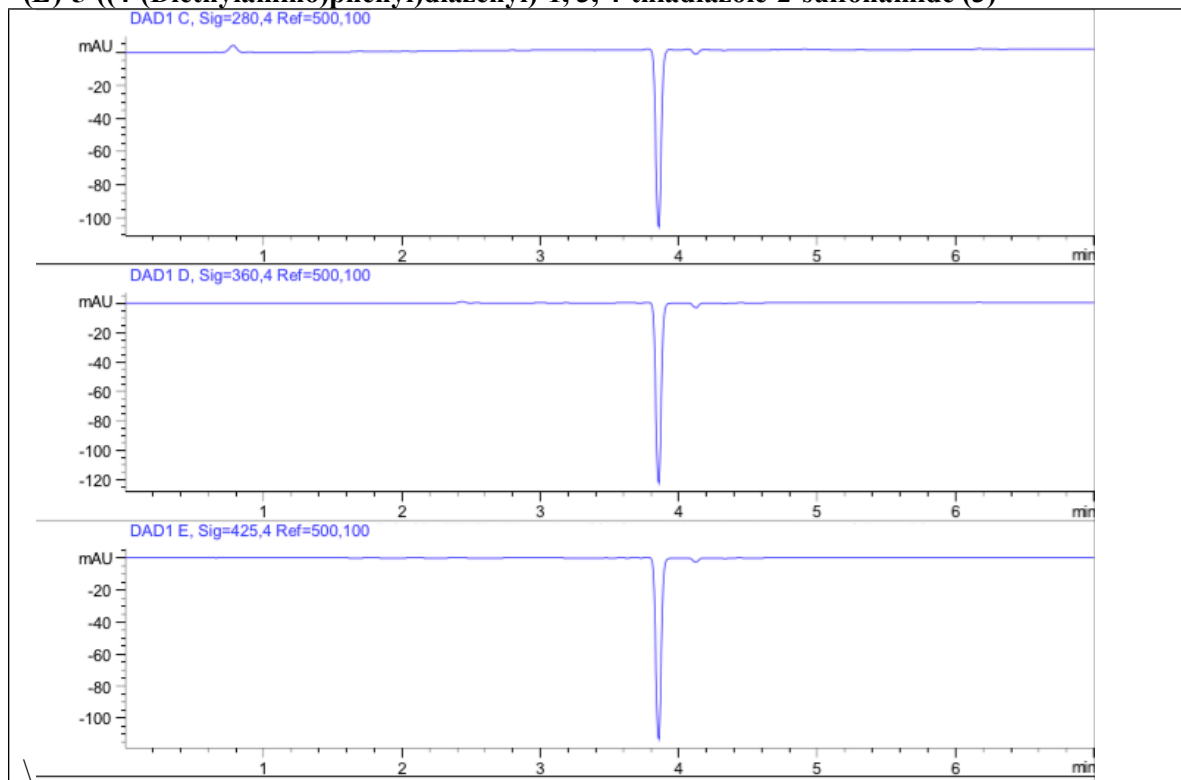



**(E)-N-(Cyclohexylcarbonyl)-5-((4-(diethylamino)phenyl)-diazenyl)-1,3,4-thiadiazole-2-sulfonamide (JB558)**

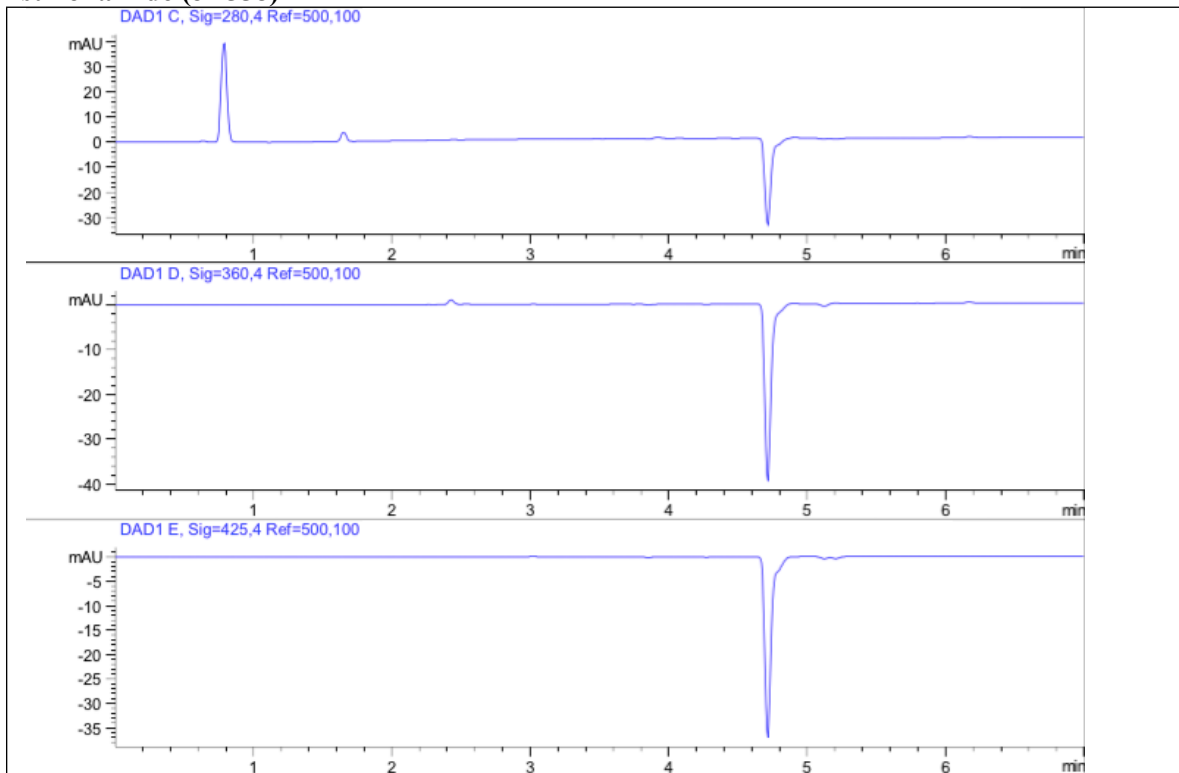

# SPECTRAL DATA

## 5-Amino-1,3,4-thiadiazole-2-sulfonamide (2)

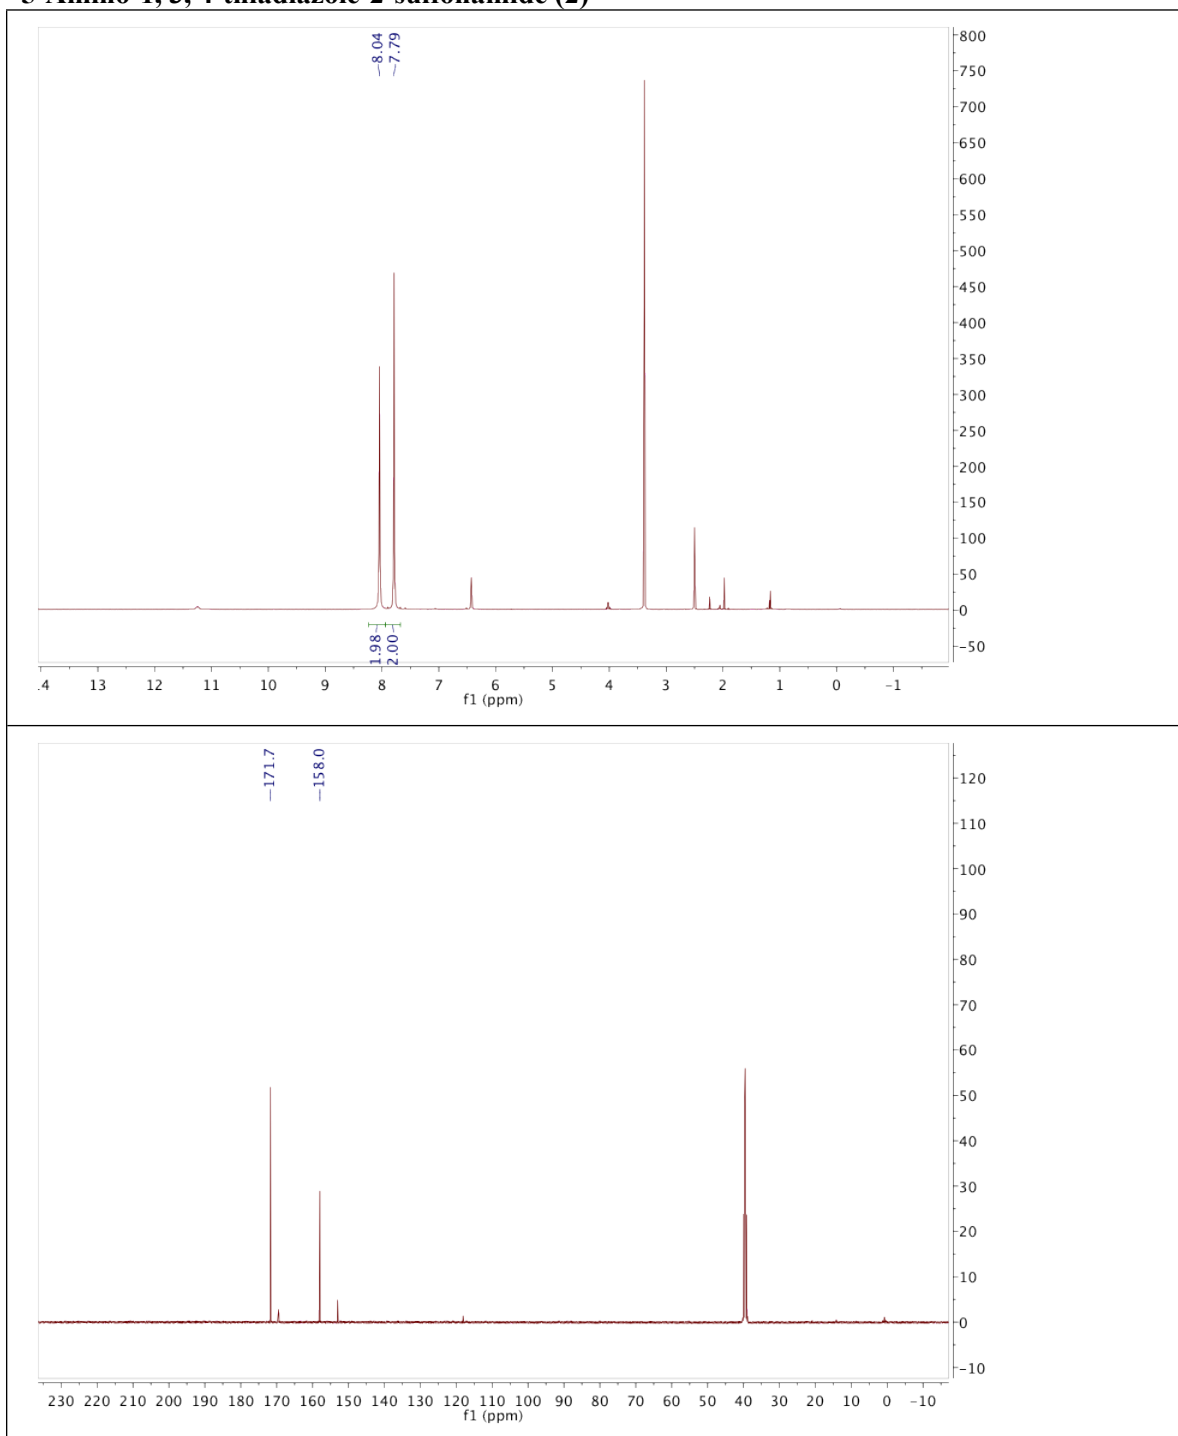

**(E)-5-((4-(Diethylamino)phenyl)diazenyl)-1,3,4-thiadiazole-2-sulfonamide (3)**

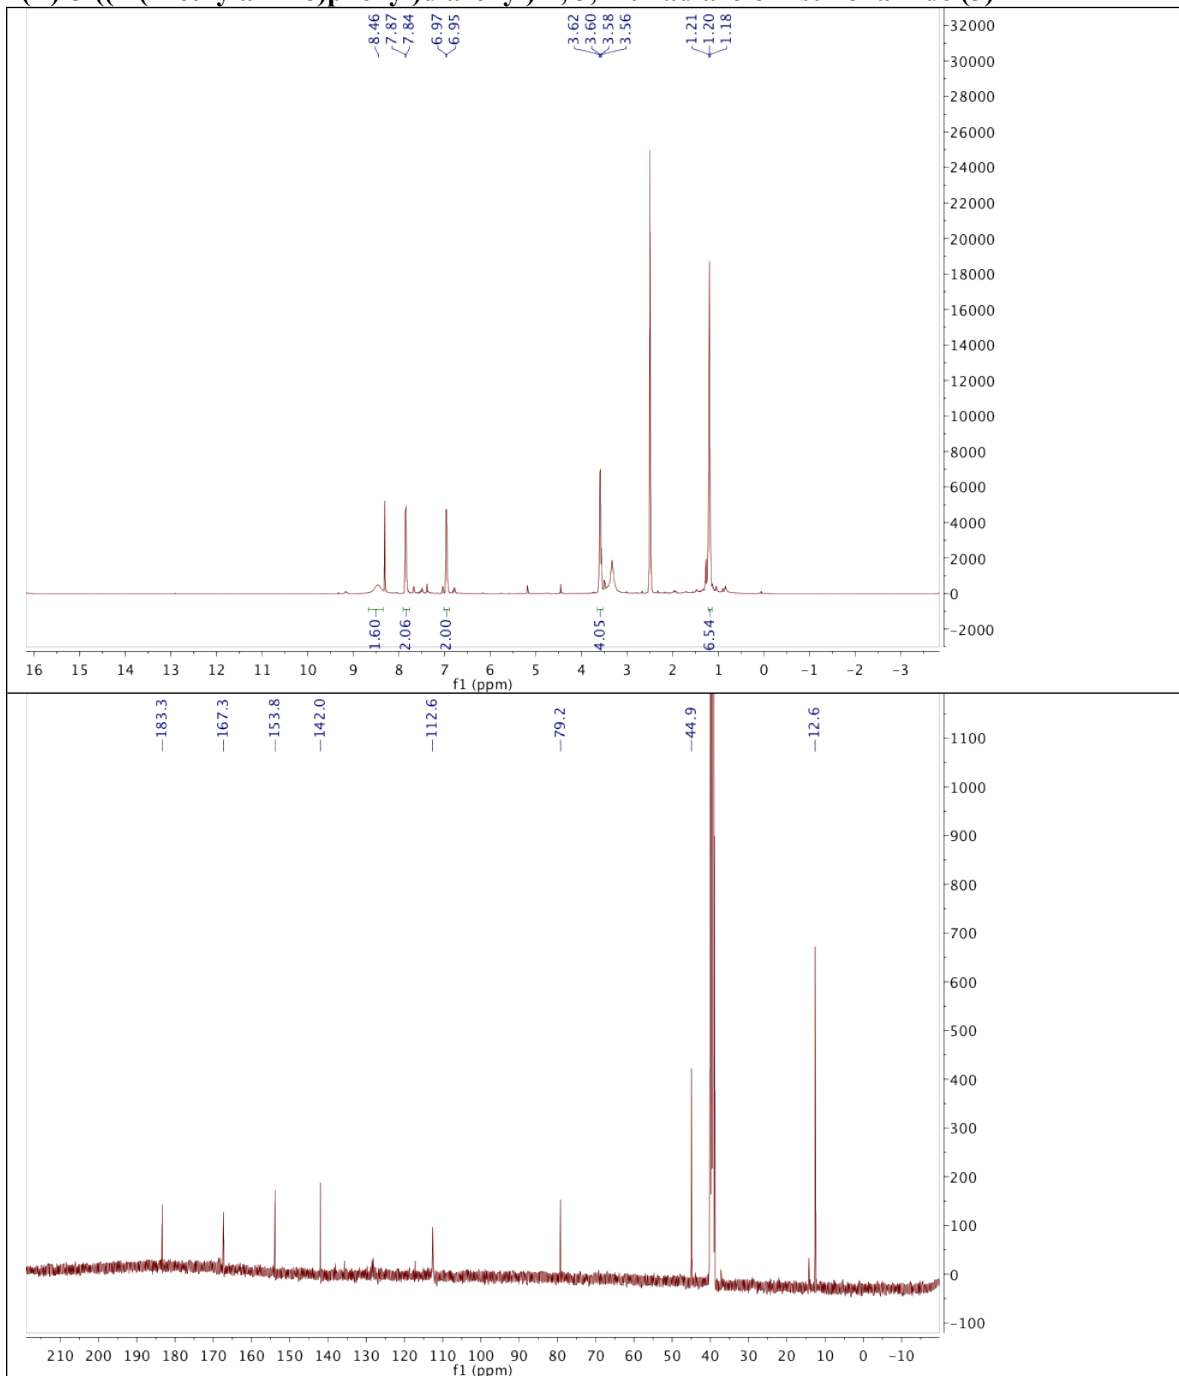

**(E)-N-(Cyclohexylcarbamoyl)-5-((4-(diethylamino)phenyl)-diazenyl)-1,3,4-thiadiazole-2-sulfonamide (JB558)**

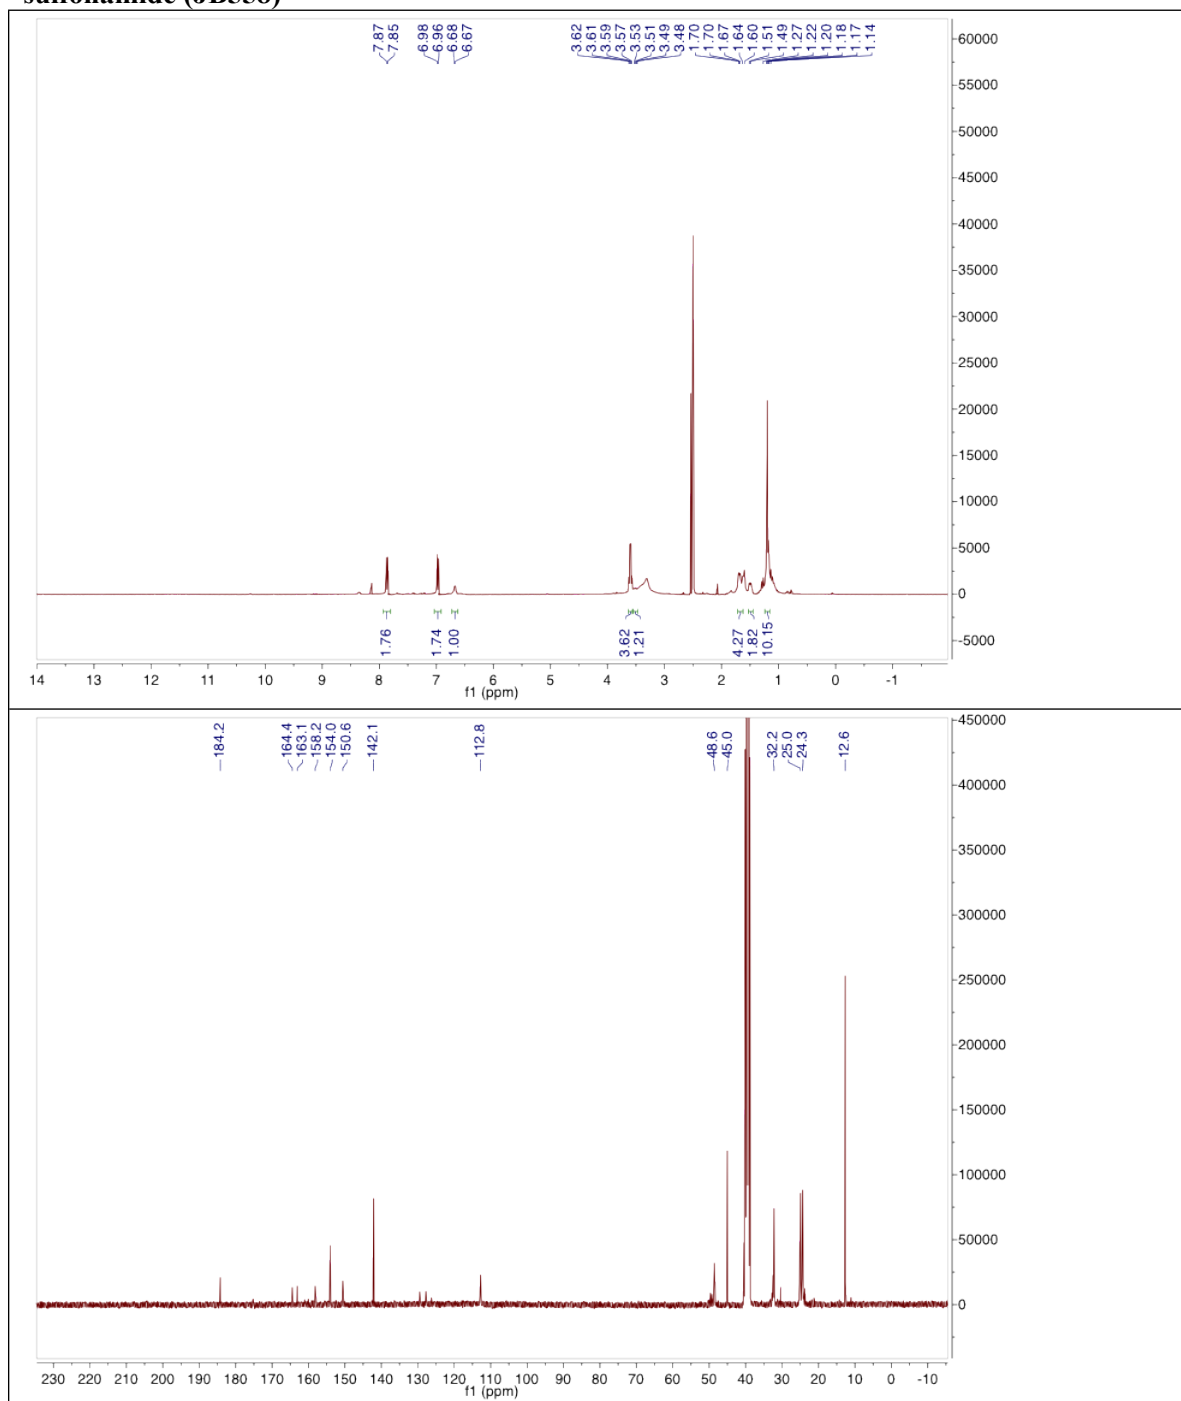

## SUPPLEMENTARY FIGURES

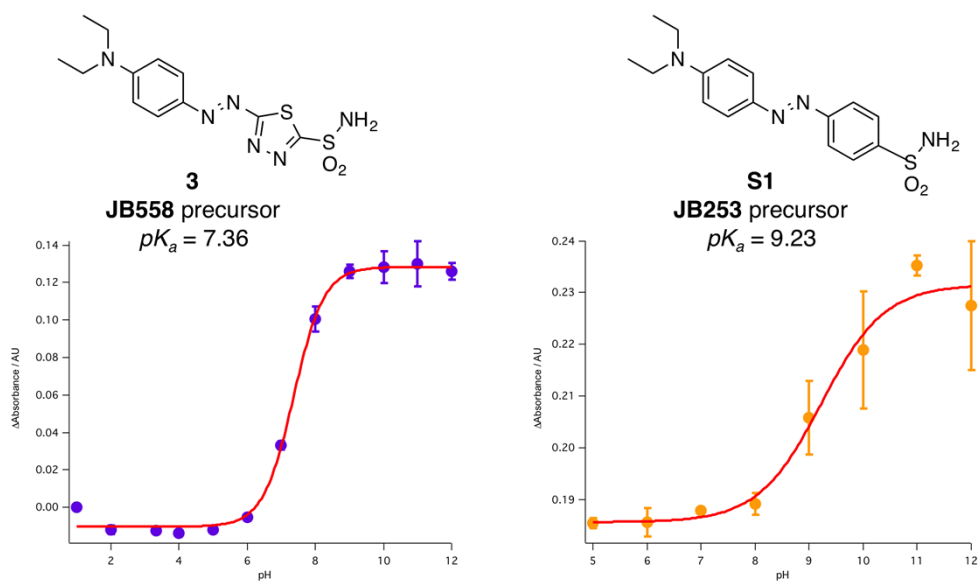

**Supplementary Fig. 1:**  $pK_a$  **3** (aqueous buffer/DMSO = 4/1) =  $7.36 \pm 0.06$  and  $pK_a$  **S1** (aqueous buffer/DMSO = 4/1) =  $9.23 \pm 0.22$ ; measured according to Martinez *et al.*<sup>7</sup>

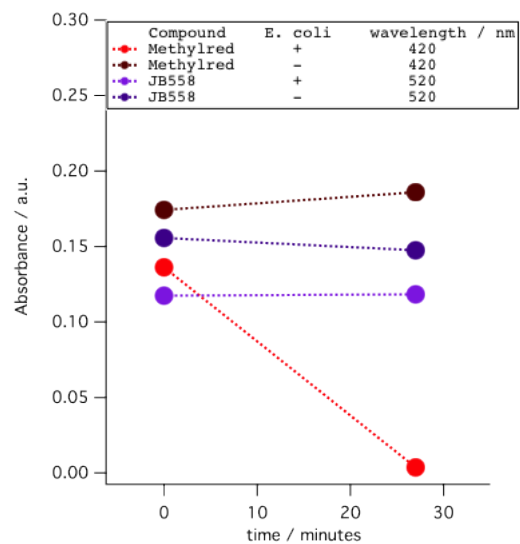

**Supplementary Fig. 2:** AzoReductase from *Escherichia coli* (BL21 DE3) is able to cleave methylred (MR) but not **JB558**.

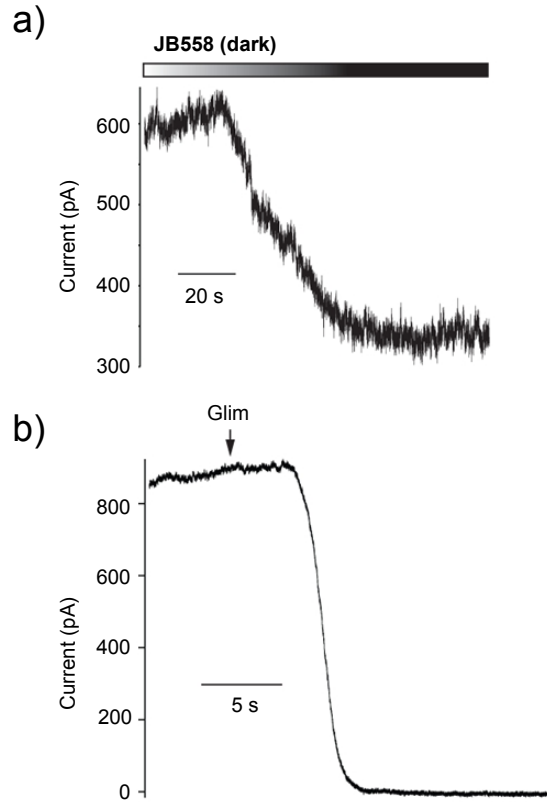

**Supplementary Fig. 3** (a) Representative whole cell voltage clamp recording in a HEK293T cell showing that 20  $\mu\text{M}$  **JB558** causes partial block ( $\sim 280$  pA) of  $\text{K}_{\text{ATP}}$  channel activity in its dark-adapted state (holding potential =  $-60$  mV). (b) As for (a) but following application of 100  $\mu\text{M}$  glimepiride (Glim), which produces complete  $\text{K}_{\text{ATP}}$  channel block ( $\sim 850$  pA).

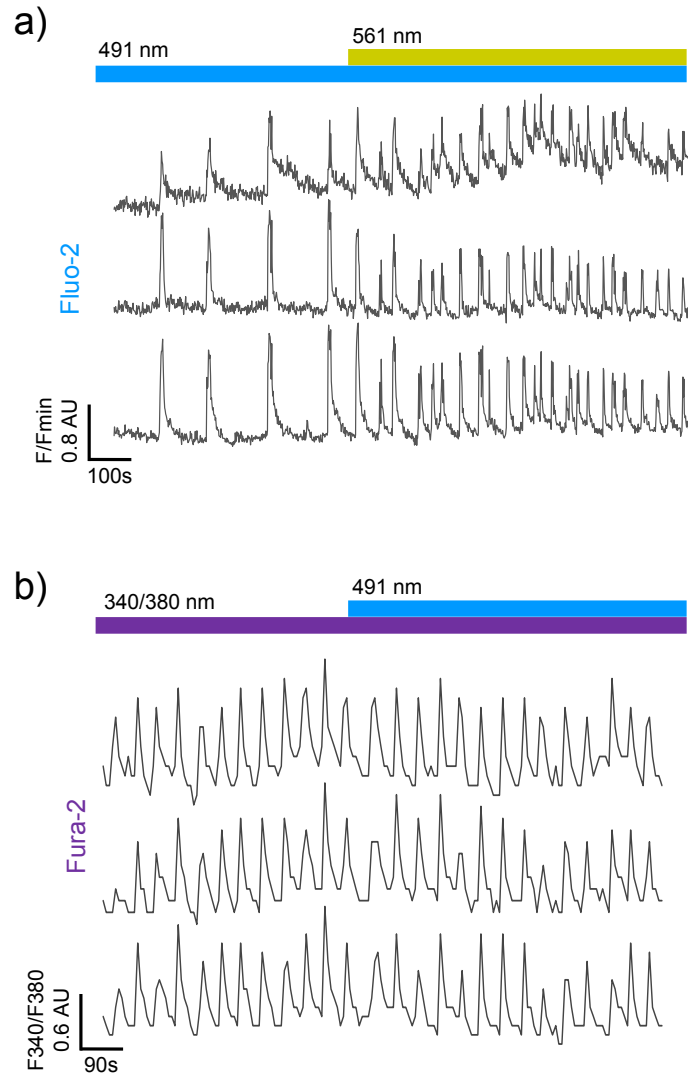

**Supplementary Fig. 4:** a) **JB558**-treated islets respond to excitation with  $\lambda = 561$  nm, but not  $\lambda = 491$  nm, with alterations to  $\text{Ca}^{2+}$ -spiking frequency and amplitude (representative trace from  $n = 3$  recordings). b) Fura-2-loaded ( $\lambda = 340/340$  nm) islets incubated with **JB558** do not respond to illumination with  $\lambda = 491$  with changes in  $[\text{Ca}^{2+}]_i$ .



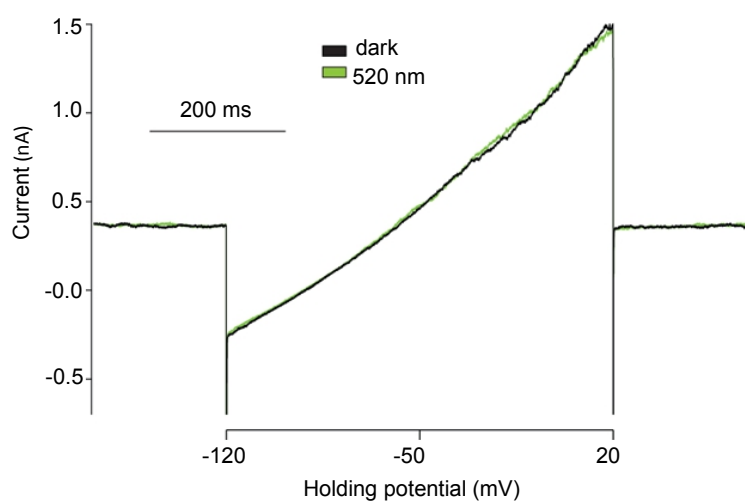

**Supplementary Fig. 5:** Voltage ramp experiments (from  $-120$  to  $+20$  mV over 1 s) in HEK293T cells show no light-dependent block of  $K_{ATP}$  channel activity in the presence of dark-adapted (black) or illuminated (green)  $20 \mu\text{M}$  **JB558**.

## REFERENCES

1. D. J. Hodson, R. K. Mitchell, E. A. Bellomo, G. Sun, L. Vinet, P. Meda, D. Li, W. H. Li, M. Bugliani, P. Marchetti, D. Bosco, L. Piemonti, P. Johnson, S. J. Hughes and G. A. Rutter, *J. Clin. Invest.*, 2013, 123, 4182-4194.
2. D. J. Hodson, R. K. Mitchell, L. Marselli, T. J. Pullen, S. G. Brias, F. Semplici, K. L. Everett, D. M. Cooper, M. Bugliani, P. Marchetti, V. Lavallard, D. Bosco, L. Piemonti, P. R. Johnson, S. J. Hughes, D. Li, W. H. Li, A. M. Shapiro and G. A. Rutter, *Diabetes*, 2014, 63, 3009-3021.
3. J. Broichhagen, M. Schönberger, S. C. Cork, J. A. Frank, P. Marchetti, M. Bugliani, A. M. J. Shapiro, S. Trapp, G. A. Rutter, D. J. Hodson and D. Trauner, *Nat. Commun.*, 2014, 5, 5116.
4. K. J. Herbst, C. Coltharp, L. M. Amzel and J. Zhang, *Chem. Biol.*, 2011, 18, 243-251.
5. G. C. Mueller and J. A. Miller, *J. Biol. Chem.*, 1949, 180, 1125-1136.
6. W. Raabe, *Adv. Exp. Med. Biol.*, 1993, 341, 71-82.
7. C. H. Martinez and C. Dardonville, *ACS Med. Chem. Lett.*, 2013, 4, 142-145.
